# Supplementary material for: Radiomics and Hybrid Models Based on Machine Learning to Predict Levodopa-Induced Dyskinesia of Parkinson’s Disease in the First 6 Years of Levodopa Treatment
Source: MDPI journal article supplement (doi:10.3390/diagnostics13152511), 2023-07-27
Supplement: s1 [file s1]

| Abbreviations                                       |           |
|-----------------------------------------------------|-----------|
| Advanced Normalization Tools                        | ANTs      |
| Area under the ROC curve                            | AUC       |
| Arterial spin labeling                              | ASL       |
| Caudate nucleus                                     | CAU       |
| Dependence Entropy                                  | DE        |
| Diffusion-weighted imaging                          | DWI       |
| FMRIB Software Library                              | FSL       |
| Globus pallidus                                     | PAL       |
| Gray Level Co-occurrence Matrix                     | GLCM      |
| Gray Level Dependence Matrix                        | GLDM      |
| Gray Level NonUniformity                            | GLNU      |
| Gray Level NonUniformity Normalized                 | GLNUN     |
| Gray Level Run Length Matrix                        | GLRLM     |
| Gray Level Size Zone Matrix                         | GLSZM     |
| High Gray Level Zone Emphasis                       | HGLZE     |
| Informational Measure of Correlation 1              | IMC1      |
| Inverse difference normalized                       | IDN       |
| Large Area High Gray Level Emphasis                 | LAHGLE    |
| LargeAreaLowGrayLevelEmphasis                       | LALGLE    |
| Levodopa equivalent dose                            | LEDD      |
| Levodopa-induced dyskinesia                         | LID       |
| Magnetic resonance imaging                          | MRI       |
| Montreal cognitive assessment                       | MoCA      |
| Neighbouring Gray Tone Difference Matrix            | NGTDM     |
| Parkinson's disease                                 | PD        |
| Putamen                                             | PUT       |
| Random forest                                       | RF        |
| Rapid eye movement sleep disorder                   | RBD       |
| Receiver operating characteristic                   | ROC       |
| Reflexes assessment                                 | REF       |
| Regions of interest                                 | ROIs      |
| Size Zone Non Uniformity                            | SZNN      |
| Small Area Emphasis                                 | SAE       |
| Small Area Low Gray Level Emphasis                  | SALGLE    |
| Small Dependence Emphasis                           | SDE       |
| Substantia nigra                                    | SN        |
| Substantia nigra pars compacta                      | SNpc      |
| Substantia nigra reticularis                        | SNpr      |
| Support vector machine                              | SVM       |
| Susceptibility imaging                              | SWI       |
| The least absolute shrinkage and selection operator | LASSO     |
| Unified Parkinson's Disease Rating Scale part III   | UPDRS III |
| Ventral tegmental area                              | VTA       |
